# Supplementary material for: The Dynamics of Naturally Acquired Immunity to Plasmodium falciparum Infection
Source: PubMed Central journal article supplement (PMC3475668; doi:10.1371/journal.pcbi.1002729), 2012-10-18
Supplement: pcbi.1002729.s004.pdf [file pcbi.1002729.s004.pdf]

## SUPPORTING TEXT S4

### The best fit parameters and goodness of fit statistics for different models.

#### 1. The model with the same PMR and different rate of initiation of blood stage infection.

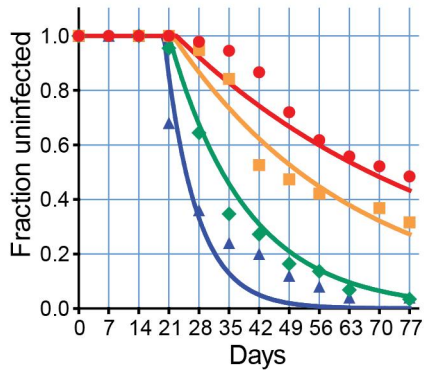

Blue triangle and blue line - C1, green diamond and green line - C2, orange square and orange line - C3, red circle and red line - A.

| Parameter                           | Estimate | Units            | 95 % CI |        |
|-------------------------------------|----------|------------------|---------|--------|
| $k_1$                               | 0.135    | Blood inf/day    | 0.089   | 0.18   |
| $k_2$                               | 0.056    | "                | 0.044   | 0.067  |
| $k_3$                               | 0.024    | "                | 0.02    | 0.028  |
| $k_4$                               | 0.015    | "                | 0.012   | 0.018  |
| $r$                                 | 2.829    | Inf . RBC /cycle | 2.56    | 3.098  |
| The goodness of fit statistics      |          |                  |         |        |
| <i>Residual Sum of Squares</i>      |          |                  |         | 0.18   |
| <i>Akaike information criterion</i> |          |                  |         | -90.55 |

#### 2. The model with the distribution of successful biting rate.

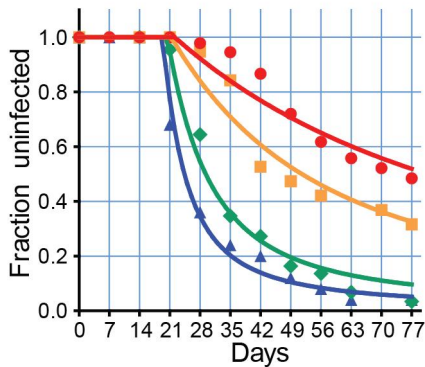

Blue triangle and blue line - C1, green diamond and green line - C2, orange square and orange line - C3, red circle and red line - A.

| Parameter                           | Estimate | Units            | 95 % CI |        |
|-------------------------------------|----------|------------------|---------|--------|
| $m_1$                               | 0.104    | Blood inf./day   | 0.000   | 0.241  |
| $m_2$                               | 0.059    | "                | 0.000   | 0.142  |
| $m_3$                               | 0.017    | "                | 0.000   | 0.045  |
| $m_4$                               | 0.009    | "                | 0.000   | 0.024  |
| $r$                                 | 2.951    | Inf . RBC /cycle | 2.676   | 3.225  |
| $p$                                 | 1.389    |                  | 0.000   | 5.085  |
| The goodness of fit statistics      |          |                  |         |        |
| <i>Residual Sum of Squares</i>      |          |                  |         | 0.106  |
| <i>Akaike information criterion</i> |          |                  |         | -109.7 |

### 3. The model with the same successful biting rate and different PMR.

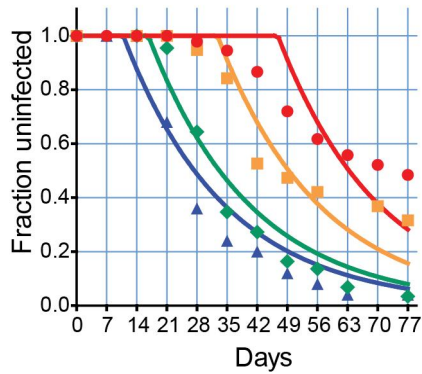

Blue triangle and blue line - C1, green diamond and green line - C2, orange square and orange line - C3, red circle and red line - A.

| Parameter                           | Estimate |                  | 95 % CI |        |
|-------------------------------------|----------|------------------|---------|--------|
| $r_1$                               | 32       | Inf . RBC /cycle | 0       | 153,5  |
| $r_2$                               | 4.48811  | "                | 1.373   | 7.6027 |
| $r_3$                               | 1.82689  | "                | 1.659   | 2      |
| $r_4$                               | 1.50842  | "                | 1.447   | 1.57   |
| $k$                                 | 0.0419   | Blood inf./day   | 0.034   | 0.0495 |
| The goodness of fit statistics      |          |                  |         |        |
| <i>Residual Sum of Squares</i>      |          |                  |         | 0.34   |
| <i>Akaike information criterion</i> |          |                  |         | -65.25 |

### 4. The model with the distribution of PMR.

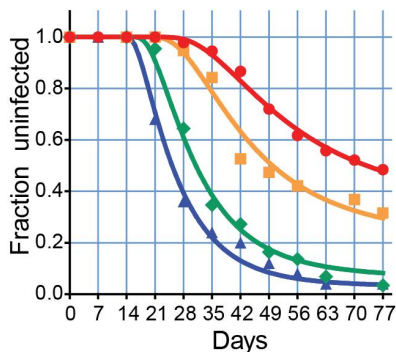

Blue triangle and blue line - C1, green diamond and green line - C2, orange square and orange line - C3, red circle and red line - A.

| Parameter                           | Estimate |                  | 95 % CI |        |
|-------------------------------------|----------|------------------|---------|--------|
| $m_1$                               | 3.785    | Inf . RBC /cycle | 2.724   | 4.846  |
| $m_2$                               | 2.667    | "                | 2.256   | 3.078  |
| $m_3$                               | 1.632    | "                | 1.537   | 1.728  |
| $m_4$                               | 1.349    | "                | 1.291   | 1.406  |
| $k$                                 | 0.109    | Blood inf./day   | 0.072   | 0.146  |
| $p$                                 | 0.369    |                  | 0.327   | 0.412  |
| The goodness of fit statistics      |          |                  |         |        |
| <i>Residual Sum of Squares</i>      |          |                  |         | 0.042  |
| <i>Akaike information criterion</i> |          |                  |         | -146.4 |
